# Supplementary material for: Engineered ferritin for lanthanide binding
Source: PubMed Central journal article supplement (PMC6089422; doi:10.1371/journal.pone.0201859), 2018-08-13
Supplement: pone.0201859.s011.pdf [file pone.0201859.s011.pdf]

| <b>Data Collection</b> | <b>apoHFt_TBP</b>                         | <b>HFt_TBP_TB</b>                         |
|------------------------|-------------------------------------------|-------------------------------------------|
| Wavelength (Å)         | 1.0                                       | 1.4                                       |
| Space group            | I222                                      | I222                                      |
| Cell Dimensions        | 237.31 237.47 237.53<br>90.00 90.00 90.00 | 237.25 237.56 237.57<br>90.00 90.00 90.00 |
| Resolution (Å)         | 48.48-2.85 (2.9-2.85)                     | 48.48-2.65 (2.70-2.65)                    |
| R <sub>merge</sub>     | 0.109 (0.833)                             | 0.133 (1.135)                             |
| I/σI                   | 17.6 (2.5)                                | 12.6(1.4)                                 |
| Completeness (%)       | 100 (100)                                 | 99.2 (94.3)                               |
| Redundancy             | 6.9 (6.8)                                 | 6.7 (5.3)                                 |
| <b>Refinement</b>      |                                           |                                           |
| Resolution (Å)         | 48.48-2.85 (2.9-2.85)                     | 48.48-2.65 (2.70-2.65)                    |
| No. unique reflections | 61020 (4475)                              | 191449 (8966)                             |
| R <sub>work</sub>      | 0.137 (0.352)                             | 0.164 (0.266)                             |
| R <sub>free</sub>      | 0.167 (0.374)                             | 0.176 (0.282)                             |
| Ligand/Ion             | 32 Iron Ions                              | 32 Terbium Ions                           |
| Water                  | 12                                        | 11                                        |
| R.m.s. Deviations      |                                           |                                           |
| Bond length (Å)        | 0.004                                     | 0.004                                     |
| Angles (°)             | 0.711                                     | 0.623                                     |
